# Supplementary material for: Two new CoII coordination polymers based on carboxylate-bridged di- and trinuclear clusters with a pyridinedicarboxylate ligand: synthesis, structures and magnetism
Source: Royal Society of Chemistry journal article supplement (doi:10.1039/c2dt30297g), 2012-01-01
Supplement: c2dt30297g.pdf [file c2dt30297g.pdf]

## Electronic Supplementary Information (ESI)

### Two new Co<sup>II</sup> coordination polymers based on carboxylate-bridged di- and trinuclear clusters with a pyridinedicarboxylate ligand: synthesis, structures and magnetism

Sui-Jun Liu, Li Xue, Tong-Liang Hu\* and Xian-He Bu

Department of Chemistry, and TKL of Metal- and Molecule-Based Material Chemistry, Nankai University, Tianjin 300071, P. R. China. E-mail: tlhu@nankai.edu.cn (T.-L. Hu)

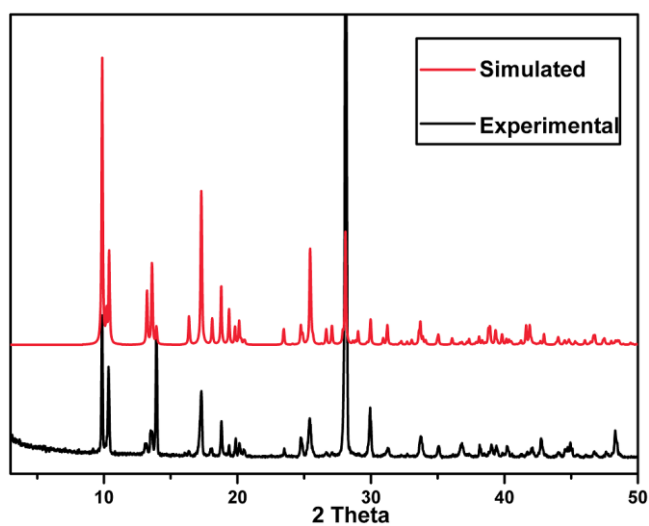

(a)

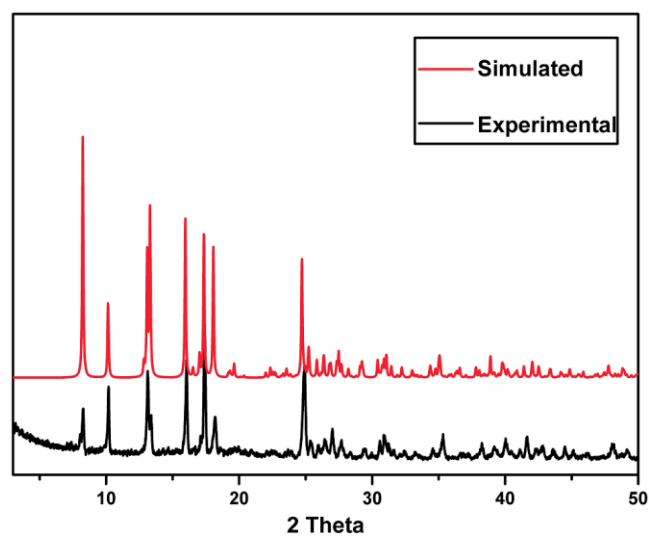

(b)

**Fig. S1.** X-ray powder diffraction (XRPD) patterns of (a) **1**, and (b) **2**.

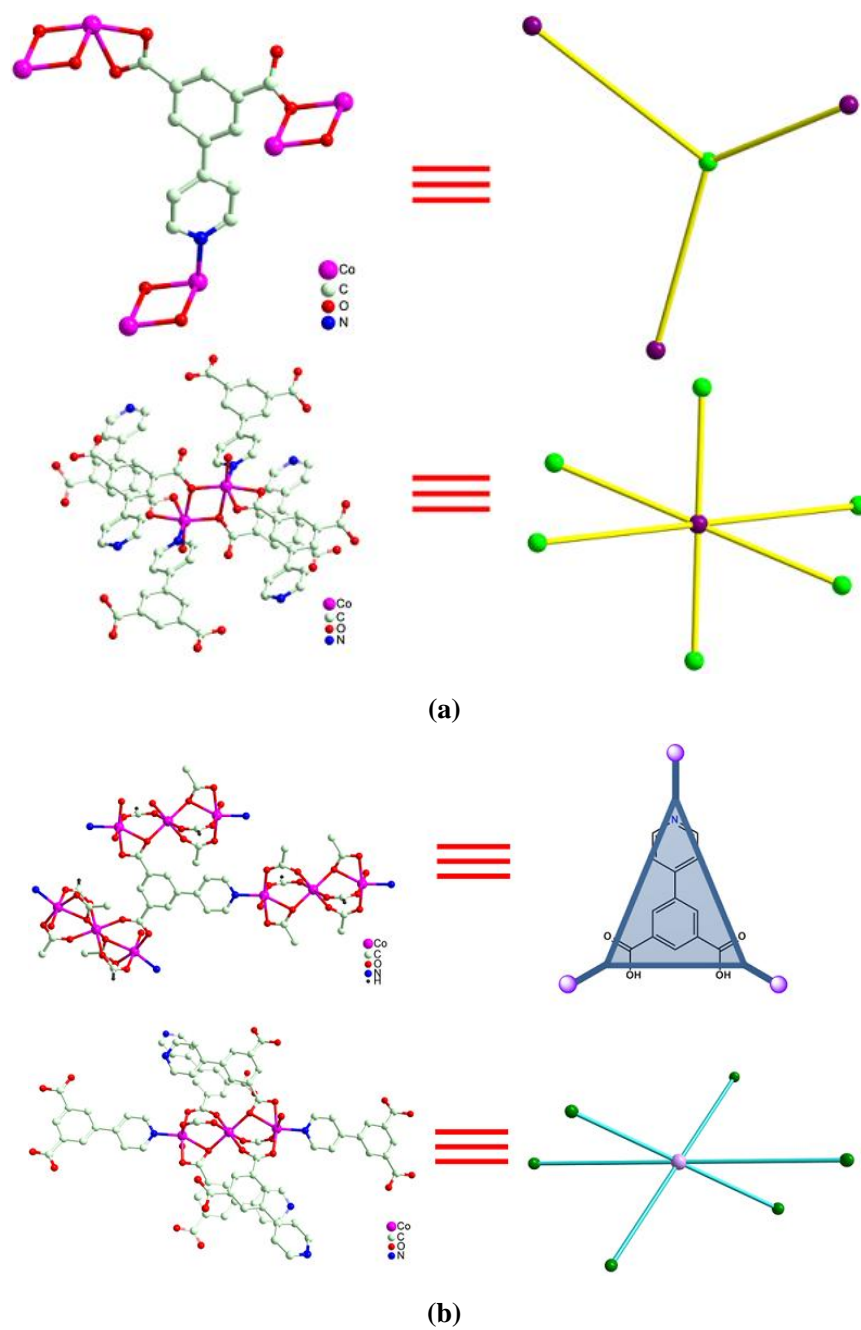

**Fig. S2.** The topology analysis of (a) 1, and (b) 2.

**Table S1.** Selected bond lengths (Å) and angles (°) for complex **1**<sup>a</sup>

|                                              |            |                                              |            |
|----------------------------------------------|------------|----------------------------------------------|------------|
| Co(1)-O(4) <sup>#1</sup>                     | 2.041(2)   | Co(1)-O(1W)                                  | 2.117(3)   |
| Co(1)-N(1) <sup>#2</sup>                     | 2.087(3)   | Co(1)-O(4)                                   | 2.250(2)   |
| Co(1)-O(2) <sup>#3</sup>                     | 2.104(2)   | Co(1)-O(1) <sup>#3</sup>                     | 2.255(2)   |
| O(4) <sup>#1</sup> -Co(1)-N(1) <sup>#2</sup> | 104.55(10) | O(2) <sup>#3</sup> -Co(1)-O(4)               | 97.43(9)   |
| O(4) <sup>#1</sup> -Co(1)-O(2) <sup>#3</sup> | 162.54(8)  | O(1W)-Co(1)-O(4)                             | 170.12(11) |
| N(1) <sup>#2</sup> -Co(1)-O(2) <sup>#3</sup> | 92.39(10)  | O(4) <sup>#1</sup> -Co(1)-O(1) <sup>#3</sup> | 102.62(9)  |
| O(4) <sup>#1</sup> -Co(1)-O(1W)              | 95.22(11)  | N(1) <sup>#2</sup> -Co(1)-O(1) <sup>#3</sup> | 152.44(9)  |
| N(1) <sup>#2</sup> -Co(1)-O(1W)              | 92.66(13)  | O(2) <sup>#3</sup> -Co(1)-O(1) <sup>#3</sup> | 60.20(9)   |
| O(2) <sup>#3</sup> -Co(1)-O(1W)              | 88.06(11)  | O(1W)-Co(1)-O(1) <sup>#3</sup>               | 89.37(12)  |
| O(4) <sup>#1</sup> -Co(1)-O(4)               | 77.13(9)   | O(4)-Co(1)-O(1) <sup>#3</sup>                | 86.27(8)   |
| N(1) <sup>#2</sup> -Co(1)-O(4)               | 95.31(9)   |                                              |            |

<sup>a</sup>Symmetry codes: #1: -x+2, -y+3, -z+2; #2: -x+1, -y+2, -z+1; #3: -x+2, -y+2, -z+2.

**Table S2.** Selected bond lengths (Å) and angles (°) for complex **2**<sup>a</sup>

|                                              |          |                                              |            |
|----------------------------------------------|----------|----------------------------------------------|------------|
| Co(1)-O(6)                                   | 2.053(6) | Co(2)-O(3)                                   | 2.034(5)   |
| Co(1)-O(4)                                   | 2.053(5) | Co(2)-O(5) <sup>#3</sup>                     | 2.116(6)   |
| Co(1)-N(1) <sup>#1</sup>                     | 2.099(6) | Co(2)-O(2) <sup>#4</sup>                     | 2.122(5)   |
| Co(1)-O(1) <sup>#2</sup>                     | 2.112(5) | Co(1)-O(1W)                                  | 2.107(7)   |
| Co(1)-O(2) <sup>#2</sup>                     | 2.289(5) |                                              |            |
| O(6)-Co(1)-O(4)                              | 94.6(2)  | O(4)-Co(1)-O(2) <sup>#2</sup>                | 106.57(19) |
| O(6)-Co(1)-N(1) <sup>#1</sup>                | 91.2(2)  | N(1) <sup>#1</sup> -Co(1)-O(2) <sup>#2</sup> | 154.3(2)   |
| O(4)-Co(1)-N(1) <sup>#1</sup>                | 97.8(2)  | O(1) <sup>#2</sup> -Co(1)-O(2) <sup>#2</sup> | 59.75(18)  |
| O(6)-Co(1)-O(1) <sup>#2</sup>                | 92.1(2)  | O(1W)-Co(1)-O(2) <sup>#2</sup>               | 82.3(2)    |
| O(4)-Co(1)-O(1) <sup>#2</sup>                | 165.3(2) | O(3)-Co(2)-O(5) <sup>#3</sup>                | 87.0(2)    |
| N(1) <sup>#1</sup> -Co(1)-O(1) <sup>#2</sup> | 95.2(2)  | O(3)-Co(2)-O(5)                              | 93.0(2)    |
| O(6)-Co(1)-O(1W)                             | 177.0(2) | O(3)-Co(2)-O(2) <sup>#4</sup>                | 94.2(2)    |
| O(4)-Co(1)-O(1W)                             | 86.7(3)  | O(3) <sup>#3</sup> -Co(2)-O(2) <sup>#4</sup> | 85.8(2)    |
| N(1) <sup>#1</sup> -Co(1)-O(1W)              | 91.2(3)  | O(5) <sup>#3</sup> -Co(2)-O(2) <sup>#4</sup> | 92.0(2)    |
| O(1) <sup>#2</sup> -Co(1)-O(1W)              | 85.9(3)  | O(5)-Co(2)-O(2) <sup>#4</sup>                | 88.0(2)    |
| O(6)-Co(1)-O(2) <sup>#2</sup>                | 94.7(2)  | O(3)-Co(2)-O(2) <sup>#2</sup>                | 85.8(2)    |

<sup>a</sup>Symmetry codes: #1: -x+1, y-1/2, -z+1/2; #2: -x+2, y-1/2, -z+3/2; #3: -x+2, -y, -z+2; #4: x, -y+1/2, z+1/2.
